# 1 **Image-derived Models of Cell Organization Changes During**

## 2 **Differentiation of PC12 Cells**

3

4 Xiongtao Ruan<sup>1§</sup>, Gregory R. Johnson<sup>1§#</sup>, Iris Bierschenk<sup>2</sup>, Roland Nitschke<sup>2,3</sup>, Melanie

5 Boerries<sup>4,5,6</sup>, Hauke Busch<sup>8</sup> and Robert F. Murphy<sup>1,7,9\*</sup>

6

7 <sup>1</sup>Computational Biology Department, School of Computer Science, Carnegie Mellon University

8 <sup>2</sup>Life Imaging Center of the Center for Biological Systems Analysis, Albert Ludwig University of Freiburg

9 <sup>3</sup>BIOSS Centre for Biological Signaling Studies, Albert Ludwig University of Freiburg

10 <sup>4</sup>Institute of Molecular Medicine and Cell Research, Center of Biochemistry and Molecular Cell Research, Albert Ludwig University of Freiburg

11 <sup>5</sup>German Cancer Consortium (DKTK), Freiburg, Germany

12 <sup>6</sup>German Cancer Research Center (DKFZ), Heidelberg, Germany,

13 <sup>7</sup>Freiburg Institute for Advanced Studies and Faculty of Biology, Albert Ludwig University of Freiburg

14 <sup>8</sup>Lübeck Institute of Experimental Dermatology and Institute of Cardiogenetics, University of Lübeck

15 <sup>9</sup>Departments of Biological Sciences, Biomedical Engineering and Machine Learning, Carnegie Mellon University, Pittsburgh, PA

16 <sup>§</sup>These authors contributed equally to this work.

## 17 **Abstract**

18 Cellular differentiation is a complex process requiring the coordination of many cellular  
19 components. PC12 cells are a popular model system to study changes driving and accompanying  
20 neuronal differentiation. While significant attention has been paid to changes in transcriptional  
21 regulation and protein signaling, much less is known about the changes in cell organization that  
22 accompany PC12 differentiation. Fluorescence microscopy can provide extensive information  
23 about this, although photobleaching and phototoxicity frequently limit the ability to continuously

---

# Present address: Allen Institute for Cell Science, Seattle, Washington

\* Corresponding author: [murphy@cmu.edu](mailto:murphy@cmu.edu)

24 observe changes in single cells over the many days that differentiation occurs. Here we describe  
25 a generative model of differentiation-associated changes in cell and nuclear shape and their  
26 relationship to mitochondrial distribution constructed from images of different cells at discrete  
27 time points. We show that our spherical harmonic-based model can accurately represent cell and  
28 nuclear shapes by measuring reconstruction errors. We then learn a regression model that relates  
29 cell and nuclear shape and mitochondrial distribution and observe that the predictive accuracy  
30 generally increases during differentiation. Most importantly, we propose a method, based on cell  
31 matching and linear interpolation in the shape space, to model the dynamics of cell  
32 differentiation using only static images. Without any prior knowledge, the method produces a  
33 realistic shape evolution process.

34

## 35 **Author Summary**

36 Cellular differentiation is an important process that is challenging to study due to the number of  
37 organizational changes it includes and the different time scales over which it occurs. Fluorescent  
38 microscopy is widely used to study cell dynamics and differentiation, but photobleaching and  
39 phototoxicity often make it infeasible to continuously observe a single cell undergoing  
40 differentiation for several days. In this work, we described a method to model aspects of the  
41 dynamics of PC12 cell differentiation without continuous imaging. We constructed accurate  
42 representations of cell and nuclear shapes and quantified the relationships between shapes and  
43 mitochondrial distributions. We used these to construct a generative model and combined it with  
44 a matching process to infer likely sequences of the changes in single cells undergoing  
45 differentiation.

46

## 47 **Introduction**

48 Cellular differentiation is a highly complex process that is incompletely understood. While  
49 fluorescence microscopy provides a widely-used tool for investigating the organization of cell  
50 components, given the number and complexity of the resulting images it is clear that there exists  
51 a need for automated methods for their analysis [1]. Tools are needed not just for describing  
52 these images, but also for creating models of cell organization that incorporate information from  
53 many cells [2].

54 Due to the intimate relationship between neuron morphology and function, particular attention  
55 has been paid to how to model and represent cell shapes. Tools have been described for tracking  
56 neurites [3] and modeling neuronal structure [4-6] using segmented electron or fluorescence  
57 microscope images. While some methods are primarily concerned with representing neuron  
58 shape via summary statistics such as shape and skeleton features [6], the software L-NEURON  
59 and ARBORVITAE [4] use distributions over semi-parametric tree representations to construct  
60 generative models of neuron morphology capable of synthesizing cell shapes. The NETMORPH  
61 software [5] likewise uses a generative modeling framework, but is additionally capable of  
62 constructing large networks of interconnected cells. Modeling of the dynamics of cell shape and  
63 organization during processes such as differentiation has received less attention. Using  
64 continuous imaging to construct models of single cells throughout a differentiation process is  
65 difficult due to compounded effects of both phototoxicity and photobleaching and the difficulty  
66 of tracking individual cells from sparse time points in long time series. Furthermore, modeling  
67 correspondences between individual neurites at different timepoints in the parametric models  
68 previously proposed is not straightforward, and those models represent cell shapes as tree  
69 structures without considering neurite or cell body thickness. Although the neuron generation

70 procedures proposed could be interpreted as growth models, they are described as biologically  
71 inspired rather than learned directly from time series.

72 Mitochondria have been shown to have a role in cell differentiation fate [7], but their spatial  
73 distributions are difficult to represent due to the fact that they form complex dynamic networks.  
74 Furthermore, there has been little work on describing the relationship between cell morphology  
75 and mitochondrial distribution.

76 Of the many model systems for cell differentiation, rat pheochromocytoma cell line PC12 is  
77 particularly useful for studying neuronal differentiation and survival [8-10]. After stimulation  
78 with Nerve Growth Factor (NGF), PC12 cells differentiate into sympathetic neuron-like cells, a  
79 process which is morphologically marked by neurite outgrowth over a time course of up to six  
80 days [11-14]. To address the goal of building continuous models of cell shape and mitochondrial  
81 distribution during differentiation, we collected images of PC12 cells at various times after  
82 treatment with NGF. From these we constructed a joint cell and nuclear shape model based on  
83 spherical harmonic descriptors [15] and a probabilistic model of mitochondrial localization [16]  
84 and combined them into a generative model of shape and mitochondrial distribution over all time  
85 points. We then developed a novel approach for combining these models to predict likely  
86 sequences of changes that single cells undergo through the differentiation process despite the fact  
87 that movies of single cells were not available.

## 88 **Results**

### 89 **Cell Component Representation**

90 As described in the Methods, we collected 3D images of mitochondrial staining of PC12 cells at  
91 various times after treatment with NGF. This was done in two large experiments, one consisting  
92 of images every 12 h up to 48 h, and one every 24 h up to 96 h; the experimental setup is

93 illustrated in S1 Fig. We decomposed the image of each cell into three components: a cell shape,  
94 a nuclear shape and a mitochondrial spatial distribution. Fig 1 shows this procedure on a typical  
95 cell image.

96

97 **Fig 1. Per-cell shape and mitochondria localization modeling procedure.** The image was  
98 segmented into cell and nuclear shapes and these were aligned using the SPHARM-RPDM  
99 method. An aligned original image (A) and the segmented cell (red) and nuclear (gray) shapes  
100 (B) are shown; these are used to create a shape space model. The individual mitochondrial  
101 objects from the original image are found using a Gaussian mixture model (C), and their  
102 positions are modeled as a probability density function (D).

### 103 **Models of Cell and Nuclear Shape**

104 Cell and nuclear shapes were first converted into spherical harmonic descriptors using Robust  
105 SPHARM-PDM (SPHARM-RPDM) [15] with shape alignment and scale normalization as  
106 described in the Methods. Out of 997 cells in the original dataset, 8 cells that were not well  
107 represented by the descriptors were removed from the analysis. Dimension reduction was done  
108 on the descriptors using principal components analysis (PCA) to generate a specified number of  
109 latent features. We found that models constructed with 300 dimensions were able to capture the  
110 cell shapes of individual cells with high accuracy, as shown in S1 Table. Some examples of  
111 reconstructed shapes from the models with the corresponding original shapes are shown in S2  
112 Fig. The models were constructed with two different methods of shape alignment, using the first  
113 order ellipse as done previously [15] or using the major axis (see Methods). The reconstructions  
114 errors were similar, but since they were slightly better for the major axis alignment approach, all  
115 subsequent analysis was done using that method.

116 To provide a loose illustration of the major trends in shape as a function of differentiation,  
117 low dimensional shape spaces constructed from the latent features are shown in Fig 2 and S3 Fig  
118 with or without the scale factors that were removed during the initial normalization. Cells from  
119 different time points overlap in shape fairly extensively, but there is a trend towards an increase  
120 in size and in the first shape component (PC1, which corresponds approximately to elongation);  
121 this is consistent with previous observations that PC12 cells start from a roughly spherical  
122 morphology and gradually flatten and spread out with more and longer neurites (that is, with  
123 more complex cell shapes) after NGF treatment. It is important to note that these two-  
124 dimensional representations do not allow full visualization of the cell and nuclear shape  
125 variation. The first principal component captures 33.6% of that variation and the second captures  
126 7.9%, leaving 58.5% unvisualized in these two-dimensional maps. However, all operations using  
127 the models described below were done in the high dimensional shape space.

128

129 **Fig 2. Shape space for the joint model of cell and nuclear shapes constructed from all cells**  
130 **for all the time points in the two experiments.** Here the cell size and first principal component  
131 are shown. Panel A shows the space with images projected in the XY-plane in the corresponding  
132 locations. Panel B shows a scatter plot with points for each cell shape; the line links the centroids  
133 of the points for adjacent time point to indicate the trend as differentiation proceeds. In both  
134 panels, blue indicates untreated cells and warmer colors indicate later time points.

### 135 **Relationship between mitochondrial localization and cell and nuclear shape**

136 For each cell in the collection, the distribution of mitochondrial localization was described as the  
137 probability of a mitochondrial object occurring at a position inside of the cell according to a  
138 standardized coordinate system relative to the cell and nuclear membranes. We used the

139 CellOrganizer implementation of the previously described method [16] in which each object is  
140 represented by its relative distance from the nucleus and the azimuth and angle from the major  
141 axis and the positions of all objects are fit using a logistic model (see Methods). The  
142 mitochondrial distribution for each cell is thus represented by the 6 parameters of the model.  
143 Given these parameters, we asked how the relationship between the mitochondrial location  
144 pattern and the cell shape changes as a function of differentiation.

145 To evaluate this relationship, we used multi-response regression to predict the mitochondria  
146 localization model given the cell and nuclear shapes, as described in Methods. We used nested  
147 leave-one-out cross validation to first determine the optimal regularization parameters  $\lambda_1$ ,  $\lambda_2$  and  
148  $\lambda_3$  and the corresponding model parameters  $\hat{B}_0$ ,  $\hat{B}$ . The parameters of the held-out cell were  
149 predicted, and the error between the predicted and measured mitochondrial parameters was  
150 recorded (this error serves as an inverse measure of the extent to which cell shape and  
151 mitochondrial localization pattern are related). Boxplots illustrating the distribution of errors at  
152 each time point and experiment with or without scale factor are shown in S4 Fig and Fig 3. There  
153 is a distinct trend towards a decrease in the error of predicting the mitochondrial localization  
154 pattern as a function of time after treatment. We compared the errors between treated time points  
155 with the initial time point without treatment (0h) via the t-test and corrected for multiple tests  
156 using Bonferroni-Holm correction [17]. An asterisk indicates a significant difference in the  
157 ability to predict the mitochondrial location pattern from the cell and nuclear shape between this  
158 time point and 0h. As can be seen in Fig 3 for predictions with only shape models, the prediction  
159 errors decreased significantly over time, compared to those in the initial untreated condition.  
160 Also, the decrease is most dramatic in the beginning (12h for 48-h experiment, 24h for 96-h  
161 experiment). For the model with scale included, the patterns of prediction errors are similar, as

162 shown in S4 Fig. The similarity between results for models with or without scale suggests shape  
163 variation rather than cell size is dominant in the prediction of mitochondria pattern.

164

165 **Fig 3. Prediction error of mitochondrial localization parameters as a function of time for**  
166 **the model between shapes (without size) and mitochondria patterns.** Panels A and B show  
167 the results for the 48-hour and 96-hour dosing experiments, respectively. At each time point (x-  
168 axis) the central box mark indicates population median, and the lower and upper bounds of the  
169 box indicate 25<sup>th</sup> and 75<sup>th</sup> percentiles. Whisker bounds cover approximately 95% of the data,  
170 with outliers shown in small crosses. An asterisk indicates that the error for that time point is  
171 statistically different from the error at the 0h time point.

172 For the decrease of the prediction errors across time, one potential explanation could be  
173 that the variation in the mitochondrial distribution from cell to cell decreases with treatment time  
174 (and thus predicting a close mitochondrial distribution is made easier). To test this, we  
175 determined whether the errors for a mitochondrial distribution predicted from a cell's shape  
176 space position were significantly smaller than those resulting from random choice of a cell from  
177 all cells in a given experiment. The models were all significant at  $\alpha < 0.05$  after Bonferroni-  
178 Holm correction as shown in S2 Table. These results indicate that a significant relationship exists  
179 between mitochondrial localization and cell shape and that the relationship becomes stronger as a  
180 function of time.

181 Fig 4 shows the distributions of the parameters of the mitochondria model for each time point  
182 for the 48h and 96h experiments.  $B_1$  and  $B_2$  (parameters weighting the distance from the nucleus)  
183 show a strong relationship to time after treatment; they also show a high degree of correlation  
184 (Fig 4B), becoming more constrained as a function of time after treatment. To illustrate variation



185 in mitochondrial patterns across time, S5 Fig shows example cell shapes, segmented  
186 mitochondria patterns, and modeled and predicted spatial probability density models, for average  
187 cell shapes every 24h for the 96h dataset.

188  
189 **Fig 4. Mitochondria distribution parameters.** A) Boxplots showing distribution of parameters  
190 for 48-hour (top) and 96-hour (bottom) experiments. Box centers indicate population median  
191 with bounds indicating 25<sup>th</sup> and 75<sup>th</sup> percentiles respectively. Whiskers indicate 99% coverage of  
192 data. B) Mitochondria distribution parameters corresponding most with time plotted against each  
193 other and colored by time for 48-hour (left) and 96-hour (right) experiments. Blue indicates  
194 untreated cells and warmer colors indicate later time points at either 12-hour or 24-hour  
195 intervals.

196

### 197 **Modeling kinetics of differentiating cells**

198 We next sought to construct a model of shape dynamics, such that we could generate movies of  
199 synthetic shapes for cells as they differentiate. Since we do not have images of the same cell at  
200 different time points, we cannot directly learn a dynamic model using the approach we have  
201 previously described [18]. Here we therefore propose an alternative model for shape dynamics.  
202 The basic idea is to assume that the populations of cells at each time point are large enough that  
203 we can consider that for each cell in our collection for a given time point that there is a cell in the  
204 collection for the next time point that is reasonably similar to what the first cell would have  
205 looked like at the later time. We find the matches between cells at adjacent time points that give  
206 the lowest total difference in shape between them (by weighted maximum bipartite matching, as  
207 described in the Methods). This gives us a “trajectory” in time and in shape space for each cell

208 at the 0h time point (without NGF treatment). Using shape evolution (synthesis) [15] we can  
209 construct intermediate shapes within each trajectory by interpolating along a linear path in the  
210 shape space between each pair of shapes in adjacent time points.

211 The expected shape differentiation models are shown in S6 Fig and Fig 5 for the 48-hour and  
212 96-hour experiments respectively, with finer and smoother synthesis of corresponding  
213 trajectories shown in S1-S8 Videos. In both figures, each row shows the evolution of cell and  
214 nuclear shape for a given cell from 0h to 48/96h. The four cells are chosen based on quantiles of  
215 total distances between the matched cells of adjacent time points across all time points. From the  
216 figures, we can see that the shape evolution method appears reasonable in terms of the  
217 reconstructions of cell shapes for either observed or unobserved cells (interpolated time points),  
218 and captures the expected trend from round cells to complicated shapes with long neurites (for  
219 most trajectories). Also, the total distances in the shape space for the trajectories reflect the  
220 overall shape variance across time, e.g. the final shapes generally become more and more  
221 complicated as the quantile increases. Moreover, the sensitivity to NGF treatment is clearly  
222 heterogeneous among PC12 cells, as some of the matched cells do not differentiate after  
223 treatment (the presence of these cells in the late time points of course indicates this as well). In  
224 S7 and S8 Fig, the expected directions for the transitions of cell shapes for different size time  
225 steps are shown. The figures confirm the last observation, as different positions in the shape  
226 space are predicted to move towards quite heterogeneous directions at the next time point  
227 (especially during the early stages). This finding of heterogeneity agrees with previous  
228 experimental studies [9, 19].

229

230 **Fig 5. Illustration of cell and nuclear shape differentiation for 12-hour time steps given cell**  
231 **shape 96-hour dosing experiment.** Four trajectories were chosen based on the quantiles of total  
232 distances between each matched cell pairs in the trajectory. The quantiles are shown in the y-  
233 axis. The time points are shown in the titles. Time points 12h, 36h, 60h and 84h are interpolated  
234 using the cells in the previous and following time points.

235  
236 **Generative model of the relationship between cell shape and mitochondrial location**  
237 **pattern**

238 In addition to simulating dynamics for cell shape, we can also model the dynamics of changes in  
239 mitochondrial distribution. Using the regression model between cell/nuclear shapes and  
240 mitochondrial patterns, we inferred parameters of the mitochondria model for each of the  
241 interpolated cell and nuclear shapes along our estimated cell trajectories. This allows a  
242 probability density distribution for mitochondria to be synthesized using the inferred parameters  
243 and the volume images of cell and nuclear shape (using the image synthesis function in  
244 CellOrganizer). Fig 6 shows the mitochondrial probability densities for the same four cells as in  
245 Fig 5. The complete sets of frames of mitochondrial patterns for these 4 cells are shown in S9-  
246 S12 Videos. Figs 5 and 6 illustrate that the method can generate very realistic intermediate cell  
247 shapes, even though there is no prior knowledge or constraints on the unobserved shapes. More  
248 importantly, the shape evolution process is also realistic, in that it represents the neurite growth  
249 process in a reasonable manner, even though no prior knowledge of how the neuron develops is  
250 provided.

251

252 **Fig 6. Illustration of mitochondria localization patterns in the differentiation for 12-hour**  
253 **time steps in the 96-h experiment.** Each row shows 2D mean value projections of the 3D  
254 mitochondrial probability density maps in a trajectory. The trajectories, as well as time points are  
255 the same as shown in Fig 5. Each column represents a time point from 0h to 96 h with time step  
256 of 12h from left to the right. The maps are shown with a hot-cold color map (blue indicates low  
257 probability of observing a mitochondrion at that location).

## 258 **Discussion**

259 One of the objectives of systems biology is to understand the relationships between cell  
260 compartments in a manner such that cell fate and the organization of unobserved components  
261 may be predicted. An additional objective is that these models not rely on human interpretation,  
262 such as hypothesized mechanisms for biochemical processes, but rather be learned directly from  
263 experimental measurements.

264 With these considerations in mind, we developed a tool to model the relationship between cell  
265 morphology and organelle organization, and demonstrated that this relationship varies during  
266 differentiation of PC12 cells. We found that there is a decrease in variation of mitochondrial  
267 localization with respect to time after differentiation.

268 Given population snapshots we constructed a model to describe shape evolution in response to  
269 NGF treatment; the model is capable of producing movies by statistically sampled differentiating  
270 cell shapes. Here we make very simple assumptions for shape dynamics in terms of both  
271 cell/nuclear shapes and mitochondria localization by interpolating across linear paths in the  
272 shape space for the cell and nuclear shape models and then estimating parameters for the  
273 localization model from those shapes. The synthetic movies appear reasonable in terms of shape  
274 dynamics even without using any prior knowledge of how PC12 cells actually differentiate. Of

275 course the model of mitochondrial localization is quite simplistic, only considering the spatial  
276 probability distribution, rather than trying to predict individual mitochondrial shapes, sizes and  
277 intensities. Thus, one potential future direction is to apply other generative methods for organelle  
278 or protein dynamics, for example, the 3D equivalent to optimal transport models [20].

279 The method we have described is capable of constructing models in a range of time-varying  
280 cell-component localization applications, including but not limited to changes associated with  
281 division and cell migration. Recent findings have shown population heterogeneity is inherent in  
282 the PC12 signaling networks [21]. The relationship between proliferation and differentiation is  
283 sharply defined by mutually exclusive pAKT and pERK concentrations [22]. This suggests an  
284 influence of stochastic effects on the cell fate decision, and that on the single cell level cells are  
285 either proliferating or differentiating. As a consequence, homogeneity of the population can be  
286 reduced by optimal growth conditions, but never completely abrogated [23, 24]. The image-  
287 derived modeling technique described here is able to model single-cell decisions and is therefore  
288 a small step in the development of tools to automatically discover relationships between cells and  
289 their components, as well as provide compact representations of these relationships learned  
290 directly from images.

## 291 **Materials and Methods**

### 292 **Cell Culture and Experimental conditions**

293 PC12 cells (between 6 and 10 passages) were obtained from ATCC (American Type Culture  
294 Collection, UK) and were cultured in RPMi medium containing 10% horse serum (HS), 5% fetal  
295 calf serum (FCS) 1% L-Glutamine and Penicillin/Streptomycin at 37°C in 5% CO<sub>2</sub>. Cells were  
296 plated on collagen coated 35mm glass-bottom ibiTreat dishes and were allowed to adhere for 24

297 hours. Two types of experiments were performed. Cells were either treated with 50ng/ml rat  
298 Nerve Growth Factor (NG; Promega, Madison, WI, USA) at 0, 12, 24, 36 and 48h prior to  
299 imaging at the same time, or were treated at the same time and imaged at 24 h increments up to  
300 96 h after treatment. An hour prior to imaging, cells were stained at 37° C with a 0.5uM solution  
301 of Mito Red (Sigma-Aldrich, Munich, Germany) for 5 minutes, rinsed with PBS and placed in  
302 1ml of growth media without Phenol red.

### 303 **Microscopy**

304 Cells were imaged on an Axio Observer.Z1 (Carl Zeiss Microscopy, Jena, Germany) microscope  
305 equipped with a spinning disk (CSU-22, Yokogawa, Japan) with an EX-Plan-Neofluar 40x/1.30  
306 Oil objective. The sample voxel size was 0.161 um x 0.161 um x 0.340 um and 59 slices were  
307 taken with a 150ms exposure time at 12-bit pixel depth. Imaged cells were manually selected to  
308 not be in contact with other cells. Due to the sensitivity of cells to phototoxicity, approximately  
309 10 fields were imaged per plate. Between 172 and 98 cells were imaged at each time point for  
310 the 48h experiment and between 46 and 89 cells per time point in the 96h experiment.

311

### 312 **Cell Shape Segmentation**

313 Each slice of an image was convolved by a 2D Hessian filter of 3 standard deviations and Eigen-  
314 edges were extracted [25]. Dilate and erosion operations were performed on each slice with a  
315 disk structuring element of 14 and 24 pixels respectively. The final shape was regularized by  
316 convolving with a Gaussian of 7-pixel standard deviations and retaining all pixels with a value  
317 greater than 0.5. The result was a “shell” of the cell shape, and thus a fill operation was  
318 performed on each remaining region.

319

## 320 **Nuclear Shape Segmentation**

321 Given a masked cell shape, the intensity image was thresholded via Ridler-Calvard [26]  
322 thresholding. The nucleus is treated as “not signal” in the thresholded image within the region of  
323 its convex hull. Because this may result in spurious objects, a distance transform was performed,  
324 segmented with an active contour, and the largest object returned as the final nuclear shape. An  
325 example of this pipeline is shown in S9 Fig.

326

## 327 **Cell and Nuclear Shape model with spherical harmonic framework**

### 328 **Shape alignment and modeling.**

329 Joint models for cell and nuclear shapes were constructed using the spherical harmonic  
330 framework as described [15]. To make different shapes comparable, this framework aligns  
331 shapes using the first-order ellipse before creating the model. As an alternative we also did  
332 alignment using the major axis. For this, the primary direction was obtained by projection of  
333 surface points to the XY-plane, followed by PCA to find the major axis. The cell shape was then  
334 aligned to this axis. After that, if the skewness along the x-axis was negative, the shape was  
335 flipped in the XY-plane.

336 After alignment of the object in the original space, it is also necessary to align the  
337 parameterization so that the final descriptors of different cells are comparable. The basic idea is  
338 to find some landmarks from the parameterization in specific directions in the original space,  
339 such as poles, points in the equator, and then rotate the parameterization. Here as a first step, a  
340 pair of vertices whose direction is mostly close to x-axis is picked as poles in the spherical  
341 parameterization. To do so, first, vertices in the object are paired with each other such that the  
342 projection to the unit sphere of one point is closest to the antipodal point of that of other point

343 (that is, the two points are (approximately) diametrically opposite to each other after mapping).  
344 Second, pairs of matched points whose vector directions are almost within XY-plane are selected  
345 as candidate north and south poles with first 1% in terms of smallest angles to XY-plane. Then  
346 from these pairs, a subset of pairs is chosen if the absolute values of the x-axis in the direction  
347 vectors are greater than a threshold (0.9999 in our implementation), in order to pick out those  
348 pairs whose directions are almost closest to the x-axis. After that, a pair with longest distance in  
349 this subset is established as south and north poles.

350 After finding the poles, the landmarks in the equator (similar as points with  $0^\circ$  and  $90^\circ$   
351 longitudes in the equator) need to be picked out. First, based on the poles, the pairs of points with  
352  $\theta$  angles mostly close to the zero are chosen. Among these points, the pair with minimum  
353 differences in the z-axis is chosen as landmarks for equator. The rotation matrix is defined as the  
354 rotation from the projected coordinate of the equator landmark (in the parameter space) with  
355 larger y-coordinate to the coordinate of (0, 1, 0). After rotation, the spherical parameterization  
356 will be flipped along x-axis, if the point in the object space with coordinate (1, 0, 0) in the  
357 parameter space has a smaller z-coordinate than that of the centroid of all surface point.

### 358 **Shape reconstruction**

359 Shape reconstruction from a SPHARM-RPDM model was done as described previously [15].  
360 The accuracy of shape reconstruction was measured using Hausdorff distance, which is defined  
361 as

$$\text{HD}(X, Y) = \max \left( \max_{y \in Y} \min_{x \in X} d(x, y), \max_{x \in X} \min_{y \in Y} d(x, y) \right) \quad (1)$$

362 where  $X$  and  $Y$  are two sets of points, and  $d(x, y)$  is a metric of distance between two points  
363 (Euclidean distance in our case). The 3D volume images of shapes were converted to surface  
364 meshes, and vertices in the meshes for the original and reconstructed surfaces were used to



365 calculate the Hausdorff distance. An additional error metric, peak signal-to-noise ratios (PSNR)  
366 between the original and reconstructed shape, was also included to evaluate the reconstruction  
367 quality. PSNR is calculated based on the Hausdorff distance with the following form:

$$\text{PSNR} = 20\log_{10} \frac{\text{BD}}{\text{HD}} \quad (2)$$

368 where BD is the diagonal of the minimum bounding box of the cell and HD is the Hausdorff  
369 distance. For the joint model, the joint reconstruction error was defined as the average of those  
370 for the two components (cell and nuclear shapes).

371

## 372 **Mitochondrial Localization Model**

373 Mitochondrial localization models were learned as described previously [16]. Briefly, the  
374 mitochondrial image after masking to the cell boundary was preprocessed by removing intensity  
375 below the Ridler-Calvard threshold. A spherical Gaussian mixture model was fit using seeds at  
376 each intensity local maxima after convolving the image with a Gaussian filter of one voxel  
377 standard deviation. The position of each voxel in the cell was parameterized according to its ratio  
378 of distance to the nuclear surface over the nuclear distance plus the distance to the cell surface,  $s$ ,  
379 and the inclination and azimuth angles,  $\theta$  and  $\phi$  respectively, from the nuclear center, and  
380 logistic function was fit to the probability that each pixel contains an object centroid,

$$P(s, \theta, \phi) = \frac{1}{1 + e^{-(\beta_0 + \beta_1 s + \beta_2 s^2 + \beta_3 \cos \phi \sin \theta + \beta_4 \sin \phi \sin \theta + \beta_5 \cos \theta)}} \quad (3)$$

381 The spatial probability distribution for each cell was parameterized by the 6-element vector  $\beta$ .

382

### 383 **Regression model between shape and mitochondrial distribution**

384 We used a multi-response regression to model and predict the mitochondrial localization model  
385 given the cell and nuclear shapes:

386

$$Y = \mathbf{1}_{n \times 1} B_0 + XB + W \quad (4)$$

387 where  $X \in R^{n \times s}$  is a matrix of joint shape-space positions of dimension  $s$ , with each row  
388 corresponding to a cell and nuclear shape, and each column a dimension of the shape space (in  
389 this case 300 dimensions without scale, 301 dimensions including scale factors as an additional  
390 feature).  $Y \in R^{n \times p}$  is a matrix of mitochondrial localization models, with each row being a  
391 model corresponding to the cell at the same row in  $X$ .  $\mathbf{1}_{n \times 1}$  is the  $n$ -dimensional column vector  
392 with all elements as 1.  $B_0$  and  $B$  are model parameters, where  $B_0 \in R^{1 \times p}$  is the parameter for the  
393 intercept and  $B \in R^{s \times p}$  is the regression matrix describing the relationship between the shape  
394 space and mitochondria localization models.  $W \in R^{n \times p}$  is a matrix of random noise following  
395 multivariate Gaussian distribution with zero-mean (the residual variation in the localization  
396 parameters not explained by model parameters). Here we combined elastic net regression [27]  
397 with a group-penalized estimator [28] of model parameters defined as

398

$$\hat{B}_0, \hat{B} = \underset{B_0, B}{\operatorname{argmin}} \frac{1}{2} \|Y - XB - \mathbf{1}_{n \times 1} B_0\|_F^2 + \lambda_1 \|vec(B)\|_1 + \lambda_2 \|B\|_F^2 + \lambda_3 \sum_{i=1}^s \|B_i\|_2 \quad (5)$$

399 where  $vec(\cdot)$  is the operator of reshaping a matrix into a column vector,  $\|\cdot\|_1$  represents the  $l_1$   
400 norm of a vector,  $\|\cdot\|_F$  stands for the Frobenius norm of a matrix, and  $\|B_i\|_2$  indicates the  $l_2$   
401 norm of  $i$ -th row of  $B$ . The regularization parameters  $\lambda_1$ ,  $\lambda_2$  and  $\lambda_3$  function as penalization  
402 terms on  $B$  to control the structure of  $B$ , as well as to avoid overfitting of the model. These

403 regularization parameters were chosen by sweeping over combined sets of possible candidate  
404 values, and selecting the set that results in the lowest mean-squared prediction error of  $Y$  via 10-  
405 fold cross validation. In the cross validation, we allowed  $\lambda_2$  and/or  $\lambda_3$  to be zero, which means  
406 that the model may degenerate into lasso regression [29] (if both  $\lambda_2$  and  $\lambda_3$  are zeros), elastic net  
407 regression [27] (if  $\lambda_3$  is zero), or sparse group lasso regression [30] (if  $\lambda_2$  is zero). The reason for  
408 the possibility of degeneration in the model is to allow more flexible control of the model in  
409 response to different situations in the datasets. We implemented the regression model with the  
410 ADMM (alternating direction method of multipliers) framework [31].

411

## 412 **Modeling kinetics of differentiating cells**

413 Given cell populations at sequential time points, we sought to find plausible and most similar cell  
414 shapes at the subsequent time point; such a shape-pair can be treated as a “trace” in time series  
415 models. This essentially becomes a matching problem, where we want to find a matching of each  
416 cell in one time point to one cell in the next time point that minimizes the total shape space  
417 distance between pairs of matched cell shapes. More formally, given the shape space positions of  
418 equal numbers of cells at subsequent time points,  $X^{t_0}, X^{t_1}$ , we can construct a matrix of cell shape  
419 distances between cells at subsequent time points,

420

$$D_{ij} = d(x_i, x_j) \quad (6)$$

421 where  $i = 1, \dots, N^{t_0}, j = 1, \dots, N^{t_1}$ , and  $N^{t_0}, N^{t_1}$  are number of cells for  $t_0$  and  $t_1$ , respectively. We  
422 want to minimize the function

423

$$\sum_{i \in X^{t_0}} \sum_{j \in X^{t_1}} D_{ij} a_{ij} \quad (7)$$

424 where  $a_{ij}$  is binary matrix of assignments taking a value of 1 if there is an assignment, and 0  
425 otherwise, subject to the constraints  $\sum_{i=1}^{N^{t_0}} a_{ij} = 1$  and  $\sum_{j=1}^{N^{t_1}} a_{ij} = 1$  [32]. This problem was solved  
426 through the Hungarian algorithm [33].

427

## 428 **Acknowledgments**

429 This work was supported in part by U.S. National Institutes of Health grants GM090033,  
430 GM103712 and EB009403, by the Excellence Initiative of the German Federal and State  
431 Governments through the Freiburg Institute for Advanced Studies, and by a Research Award to  
432 RFM from the Alexander von Humboldt Foundation.

## 433 **Availability**

434 The CellOrganizer software used here for modeling these  
435 relationships is available at <http://cellorganizer.org>. The  
436 source code for performing all analyses in this paper, as well  
437 as analysis results, is available for reviewers at  
438 [http://murphylab.cbd.cmu.edu/software/2019\\_PC12](http://murphylab.cbd.cmu.edu/software/2019_PC12). This link is  
439 currently hidden (and not tracked) and will be made public upon  
440 manuscript acceptance by linking to it from  
441 <http://murphylab.cbd.cmu.edu/software>. The original images are  
442 available at  
443 <https://datadryad.org/review?doi=doi:10.5061/dryad.hc8037v>

444

445

446

## 447 **References**

- 448 1. Eliceiri KW, Berthold MR, Goldberg IG, Ibáñez L, Manjunath BS, Martone ME, et al.  
449 Biological imaging software tools. *Nature methods*. 2012;9(7):697-710.
- 450 2. Murphy RF. Building cell models and simulations from microscope images. *Methods*.  
451 2016;96:33-9. doi: 10.1016/j.ymeth.2015.10.011. PubMed PMID: 26484733; PubMed Central  
452 PMCID: PMC4766043.
- 453 3. Meijering E. Neuron tracing in perspective. *Cytometry Part A*. 2010;77(7):693-704.
- 454 4. Ascoli GA, Krichmar JL, Nasuto SJ, Senft SL. Generation, description and storage of  
455 dendritic morphology data. *Philos Trans R Soc Lond B Biol Sci*. 2001;356(1412):1131-45. Epub  
456 2001/09/08. doi: 10.1098/rstb.2001.0905. PubMed PMID: 11545695; PubMed Central PMCID:  
457 PMCPMC1088507.
- 458 5. Koene RA, Tijms B, van Hees P, Postma F, de Ridder A, Ramakers GJ, et al.  
459 NETMORPH: a framework for the stochastic generation of large scale neuronal networks with  
460 realistic neuron morphologies. *Neuroinformatics*. 2009;7(3):195-210.
- 461 6. Vallotton P, Lagerstrom R, Sun C, Buckley M, Wang D, De Silva M, et al. Automated  
462 analysis of neurite branching in cultured cortical neurons using HCA-Vision. *Cytometry Part A:*  
463 *The Journal of the International Society for Analytical Cytology*. 2007;71(10):889-95.
- 464 7. Mandal S, Lindgren AG, Srivastava AS, Clark AT, Banerjee U. Mitochondrial function  
465 controls proliferation and early differentiation potential of embryonic stem cells. *Stem cells*.  
466 2011;29(3):486-95.
- 467 8. Greene LA, Tischler AS. Establishment of a noradrenergic clonal line of rat adrenal  
468 pheochromocytoma cells which respond to nerve growth factor. *Proceedings of the National*  
469 *Academy of Sciences*. 1976;73(7):2424-8.
- 470 9. Burstein DE, Blumberg PM, Greene LA. Nerve growth factor-induced neuronal  
471 differentiation of PC12 pheochromocytoma cells: lack of inhibition by a tumor promoter. *Brain*  
472 *research*. 1982;247(1):115-9.
- 473 10. Cowley S, Paterson H, Kemp P, Marshall CJ. Activation of MAP kinase kinase is  
474 necessary and sufficient for PC12 differentiation and for transformation of NIH 3T3 cells. *Cell*.  
475 1994;77(6):841-52.
- 476 11. Levi-Montalcini R. The nerve growth factor: thirty-five years later. *Bioscience reports*.  
477 1987;7(9):681-99.
- 478 12. Chao MV. Neurotrophin receptors: a window into neuronal differentiation. *Neuron*.  
479 1992;9(4):583-93.
- 480 13. Fiore M, Chaldakov GN, Aloe L. Nerve growth factor as a signaling molecule for nerve  
481 cells and also for the neuroendocrine-immune systems. *Reviews in the Neurosciences*.  
482 2009;20(2):133-45.
- 483 14. Weber S, Fernandez-Cachon ML, Nascimento JM, Knauer S, Offermann B, Murphy RF,  
484 et al. Label-free detection of neuronal differentiation in cell populations using high-throughput

- 485 live-cell imaging of PC12 cells. *PLoS One*. 2013;8(2):e56690. doi:  
486 10.1371/journal.pone.0056690. PubMed PMID: 23451069; PubMed Central PMCID:  
487 PMCPMC3579923.
- 488 15. Ruan X, Murphy RF. Evaluation of methods for generative modeling of cell and nuclear  
489 shape. *Bioinformatics*. 2018;in press. doi: 10.1093/bioinformatics/bty983.
- 490 16. Peng T, Murphy RF. Image-derived, three-dimensional generative models of cellular  
491 organization. *Cytometry Part A*. 2011;79(5):383-91.
- 492 17. Holm S. A simple sequentially rejective multiple test procedure. *Scandinavian journal of*  
493 *statistics*. 1979:65-70.
- 494 18. Johnson GR, Buck TE, Sullivan DP, Rohde GK, Murphy RF. Joint modeling of cell and  
495 nuclear shape variation. *Molecular Biology of the Cell*. 2015;26(22):4046-56. Epub 2015/09/12.  
496 doi: 10.1091/mbc.E15-06-0370. PubMed PMID: 26354424; PubMed Central PMCID:  
497 PMCPMC4710235.
- 498 19. Clementi E, Raichman M, Meldolesi J. Heterogeneity of NGF-induced differentiation in  
499 PC12 cells investigated in a battery of isolated cell clones. *Functional neurology*. 1993;8(2):109-  
500 13.
- 501 20. Kolouri S, Tosun AB, Ozolek JA, Rohde GK. A continuous linear optimal transport  
502 approach for pattern analysis in image datasets. *Pattern Recognition*. 2015;51:453-62.
- 503 21. Ryu H, Chung M, Dobrzyński M, Fey D, Blum Y, Lee SS, et al. Frequency modulation  
504 of ERK activation dynamics rewires cell fate. *Molecular systems biology*. 2015;11(11):838.
- 505 22. Chen J-Y, Lin J-R, Cimprich KA, Meyer T. A two-dimensional ERK-AKT signaling  
506 code for an NGF-triggered cell-fate decision. *Molecular cell*. 2012;45(2):196-209.
- 507 23. Chung J, Miura N, Ito A, Sawada M, Nishikawa S, Kuroda K, et al. Single-cell  
508 heterogeneity in suppression of PC12 differentiation by direct microinjection of a differentiation  
509 inhibitor, U0126. *Cell biology international*. 2014;38(10):1215-20.
- 510 24. Mouri K, Sako Y. Optimality conditions for cell-fate heterogeneity that maximize the  
511 effects of growth factors in PC12 cells. *PLOS Comput Biol*. 2013;9(11):e1003320.
- 512 25. Ronneberger O, Wang Q, Burkhardt H. Fast and robust segmentation of spherical  
513 particles in volumetric data sets from brightfield microscopy. 5th IEEE International Symposium  
514 on Biomedical Imaging: From Nano to Macro: IEEE; 2008. p. 372-5.
- 515 26. Ridler T, Calvard S. Picture thresholding using an iterative selection method. *IEEE*  
516 *transactions on Systems, Man and Cybernetics*. 1978;8(8):630-2.
- 517 27. Zou H, Hastie T. Regularization and variable selection via the elastic net. *J Roy Stat Soc*  
518 *B*. 2005;67:301-20. doi: DOI 10.1111/j.1467-9868.2005.00503.x. PubMed PMID:  
519 WOS:000227498200007.
- 520 28. Simon N, Friedman J, Hastie T. A blockwise descent algorithm for group-penalized  
521 multiresponse and multinomial regression. *arXiv preprint arXiv:13116529*. 2013.
- 522 29. Tibshirani R. Regression shrinkage and selection via the Lasso. *J Roy Stat Soc B Met*.  
523 1996;58(1):267-88. PubMed PMID: WOS:A1996TU31400017.
- 524 30. Simon N, Friedman J, Hastie T, Tibshirani R. A sparse-group lasso. *Journal of*  
525 *Computational and Graphical Statistics*. 2013;22(2):231-45.
- 526 31. Boyd S, Parikh N, Chu E, Peleato B, Eckstein J. Distributed optimization and statistical  
527 learning via the alternating direction method of multipliers. *Foundations and Trends in Machine*  
528 *learning*. 2011;3(1):1-122.
- 529 32. Christofides N. *Graph Theory, An algorithmic approach*: New York: Academic Press Inc;  
530 1975.

531 33. Kuhn HW. The Hungarian method for the assignment problem. *Naval research logistics*  
532 *quarterly*. 1955;2(1-2):83-97.  
533

## 534 **Supporting information**

535 **S1 Fig. Treatment and imaging protocol for PC12 cells.** Two experiments were performed. 24  
536 hours after plating, cells were treated with NGF at 12 or 24-hour intervals for 48 or 96 hours,  
537 each resulting in 4 time points after NGF treatment and an untreated group.

538  
539 **S2 Fig. Illustration of shape reconstructions with the SPHARM-RPDM model.** Panels A and  
540 B show reconstructions from a model of only cell shape and both cell and nuclear shapes,  
541 respectively. The original shapes, reconstruction with the model using alignment by the major-  
542 axis method, and reconstruction with the model using alignment by FOE method are shown. For  
543 both cases, the reconstructions are generated using models with 300-dimensional representations.  
544 For each panel, the cells in the columns were picked based on the quantiles of Hausdorff  
545 distances of the major-axis method (with the quantile shown at the top of the column); thus the  
546 cells on the left were easier to reconstruct and the reconstructions of cells on the right reveal  
547 some minor differences. The HD and peak signal-to-noise ratio (PSNR) are listed under each  
548 reconstruction.

549  
550 **S3 Fig. Shape space for the joint model of cell and nuclear shapes constructed from all cells**  
551 **as all time points in the two experiments.** Here the first two principal components are shown.  
552 Panel A shows the space with images projected in the XY-plane in the corresponding locations.  
553 Panel B shows a scatter plot with points for each cell shape; the line links the centroids of the  
554 points for adjacent time point to indicate the trend as differentiation proceeds. In both panels,  
555 blue indicates untreated cells, where warmer colors indicate later time points, as shown in the  
556 legend of panel B.



557  
558 **S4 Fig. Prediction error of mitochondrial localization parameters as a function of time for**  
559 **the model between shapes including cell size and mitochondria patterns.** Panels A and B  
560 show the results for the 48-hour and 96-hour dosing experiments respectively. At each time point  
561 (x-axis) the central box mark indicates population median, and the lower and upper bounds of the  
562 box indicate 25<sup>th</sup> and 75<sup>th</sup> percentiles. Whisker bounds cover approximately 95% of the data,  
563 with outliers shown in small crosses. An asterisk indicates that the errors for that time point are  
564 statistically different from the errors at the 0h time point.

565 **S5 Fig. Example mitochondrial distribution patterns for most-average cell shapes at 24-**  
566 **hour intervals for the 96-hour experiment.** Each column shows cell shape, segmented  
567 mitochondrial pattern, modeled mitochondria spatial probability distribution, predicted  
568 mitochondria spatial probability distribution, and the probability distributions registered to a  
569 “canonical” cell shape of two nested spheres with the volume of the average nucleus and cell  
570 sizes respectively.

571 **S6 Fig. Illustration of synthetic cell/nuclear shape differentiation for 6-hour time steps**  
572 **given cell shape 48-hour dosing experiment.** Four trajectories are chosen based on the  
573 quantiles of total distances between each matched cell pairs in the trajectory. The quantiles are  
574 shown in the y-axis. The time points are shown as in the titles. Time points 6h, 18h, 30h and 42h  
575 are interpolated using the cells in the previous and following time points.

576  
577 **S7 Fig. Expected shape differentiation estimated from trajectories in the 48h experiment**  
578 **for 12-hour time steps.** The expected shape change is estimated according to the matching  
579 between each pair of time points. Color indicates relative probability density of a cell shape at

580 that time point, and the vector indicates the direction of the shape change. White dots indicate  
581 positions of observed shapes. The remaining shape-space dimensions have been marginalized  
582 out. Vector arrows have been scaled for visualization purposes.

583 **S8 Fig. Expected shape differentiation estimated from trajectories in the 48h and 96h**  
584 **experiments for 24-hour time steps.** The first row shows the expected transitions from 0h to  
585 24h and 24h to 48h in the 48h experiment as comparisons to those in 96h experiment. The  
586 expected shape change is estimated according to the matching between each pair of time points.  
587 Color indicates relative probability density of a cell shape at that time point, and the vector  
588 indicates the direction of shape change. White dots indicate positions of observed shapes. The  
589 remaining shape-space dimensions have been marginalized out. Vector arrows have been scaled  
590 for visualization purposes.

591  
592 **S9 Fig. Nucleus segmentation procedure.** The original image (A) was segmented (B), and a  
593 convex hull was formed (C). The candidate nuclear region is the “not signal” from the segmented  
594 image within the convex hull (D). The result is distance transformed (E) and segmented via  
595 active contour methods (F).

596  
597 **S1 Table. Reconstruction errors for cell shape and joint models with FOE and Major-axis**  
598 **alignment.** To calculate reconstruction errors, the dataset was randomly split into training (842)  
599 and testing (147) sets, with the model built with training set and the reconstruction error  
600 calculated over the testing set. The cell shape model and joint model were built with either FOE  
601 alignment as described [15] or major-axis alignment as described in Methods. The number of  
602 latent dimensions for both models is 300. The means of HD and PSNR (in parenthesis) as

603 defined in Methods among cells in the testing set are shown here. Lower HD and higher PSNR  
604 indicate better reconstructions. For joint modeling, the errors for cell shape, nuclear shape and  
605 average of the two components (joint error) are all shown in the table for reference.

606

607 **S2 Table. P-values of t-tests of prediction errors for mitochondrial distributions from shape**  
608 **models.** For each experiment and each condition (with or without including of cell size) in a time  
609 point, the prediction errors are tested against random choices of original parameters of all cells  
610 for all time points in the same experiment. For each test in each time point each condition in each  
611 experiment, 1,000,000 such random choices are performed. The p-values are corrected via  
612 Bonferroni-Holm correction for all time points in both experiments in the same condition.

613

614 **S1 Video. Synthesized PC12 cell differentiation in response to treatment of NGF for the**  
615 **first cell in Fig 5.** Cell shapes were inferred at 2.4h time steps aiming to illustrating smoother  
616 and more realistic transitions.

617

618 **S2 Video. Synthesized PC12 cell differentiation in response to treatment of NGF for the**  
619 **second cell in Fig 5.** Cell shapes were inferred at 2.4h time steps aiming to illustrating smoother  
620 and more realistic transitions.

621

622 **S3 Video. Synthesized PC12 cell differentiation in response to treatment of NGF for the**  
623 **third cell in Fig 5.** Cell shapes were inferred at 2.4h time steps aiming to illustrating smoother  
624 and more realistic transitions.

625

626 **S4 Video. Synthesized PC12 cell differentiation in response to treatment of NGF for the**  
627 **fourth cell in Fig 5.** Cell shapes were inferred at 2.4h time steps aiming to illustrating smoother  
628 and more realistic transitions.

629  
630 **S5 Video. Synthesized probability density maps for mitochondria during PC12 cell**  
631 **differentiation in response to treatment of NGF for the first cell in Fig 6.** Cell shapes were  
632 inferred in 2.4h time steps to provide smoother transitions. The density is shown with a hot-cold  
633 color map similar to Fig 6.

634  
635 **S6 Video. Synthesized probability density maps for mitochondria during PC12 cell**  
636 **differentiation in response to treatment of NGF for the second cell in Fig 6.** Cell shapes were  
637 inferred in 2.4h time steps to provide smoother transitions. The density is shown with a hot-cold  
638 color map similar to Fig 6.

639  
640 **S7 Video. Synthesized probability density maps for mitochondria patterns during PC12**  
641 **cell differentiation in response to treatment of NGF for the third cell in Fig 6.** Cell shapes  
642 were inferred in 2.4h time steps to provide smoother transitions. The density is shown with a hot-  
643 cold color map similar to Fig 6.

644  
645 **S8 Video. Synthesized probability density maps for mitochondria patterns during PC12**  
646 **cell differentiation in response to treatment of NGF for the fourth cell in Fig 6.** Cell shapes  
647 were inferred in 2.4h time steps to provide smoother transitions. The density is shown with a hot-  
648 cold color map similar to Fig 6.

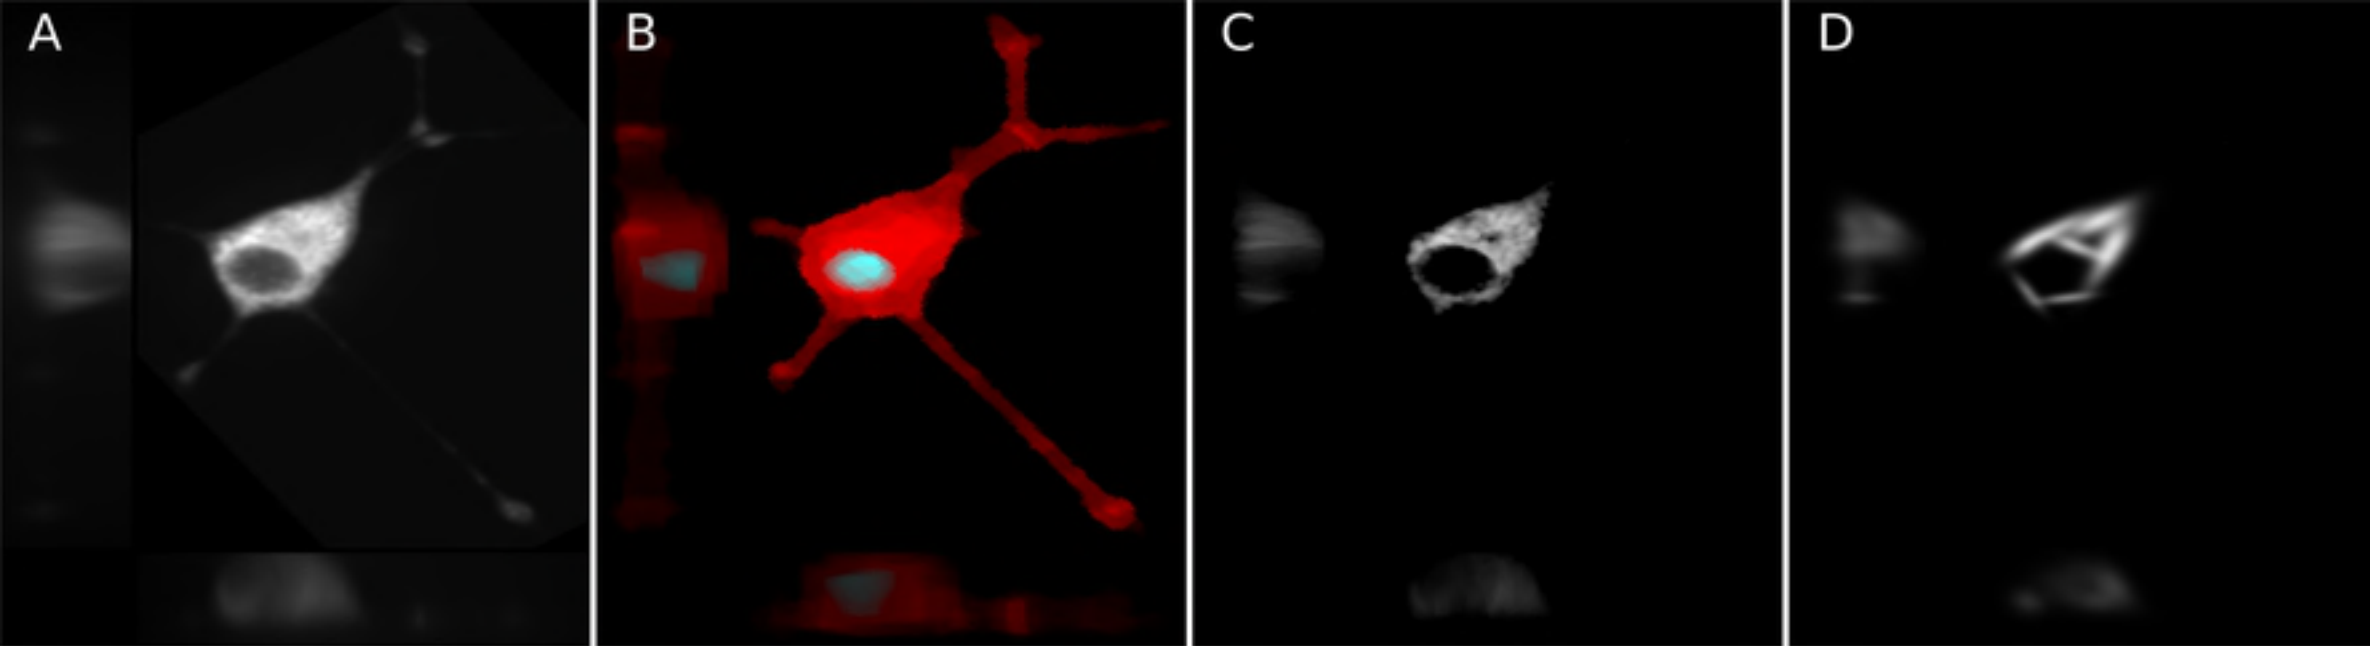

Figure 1

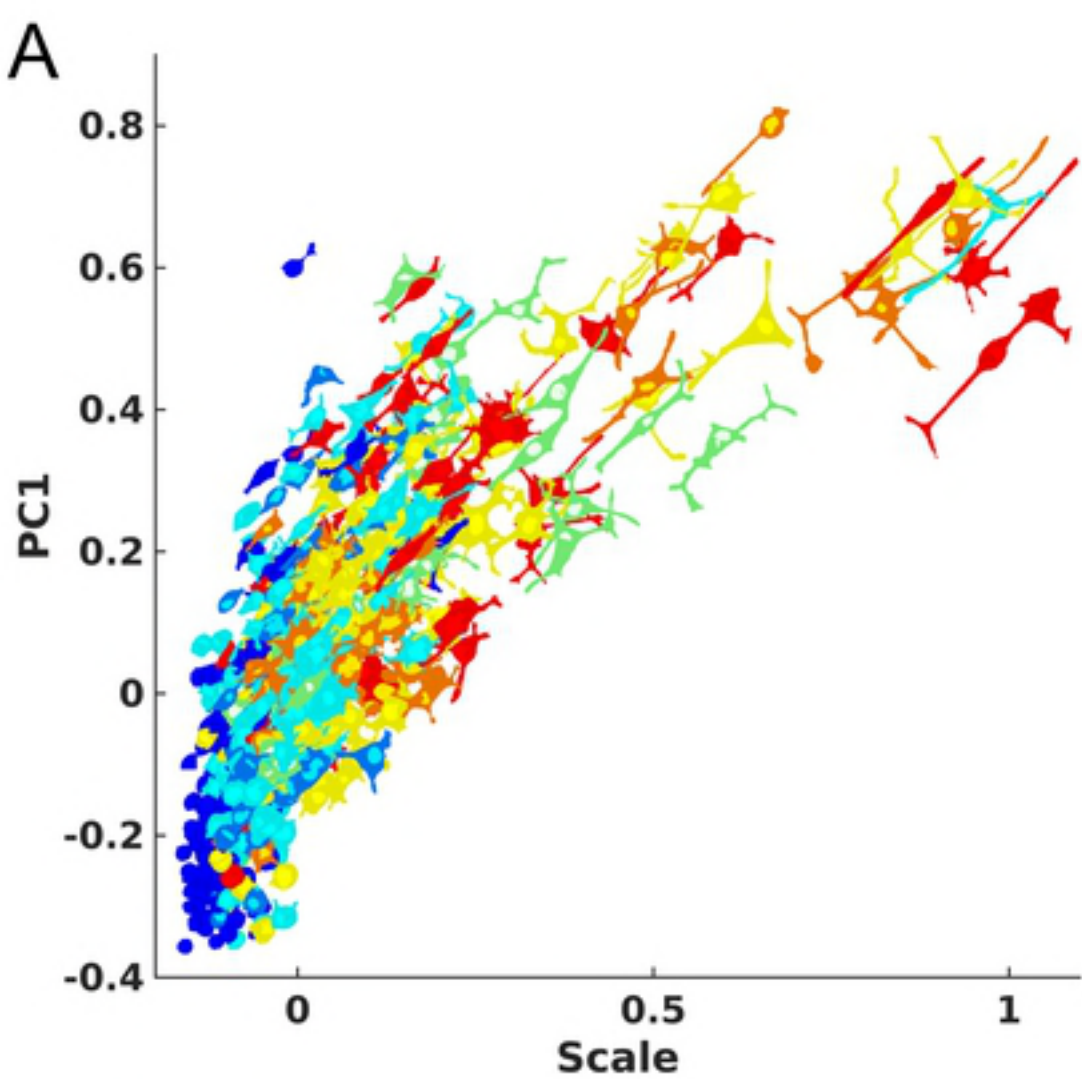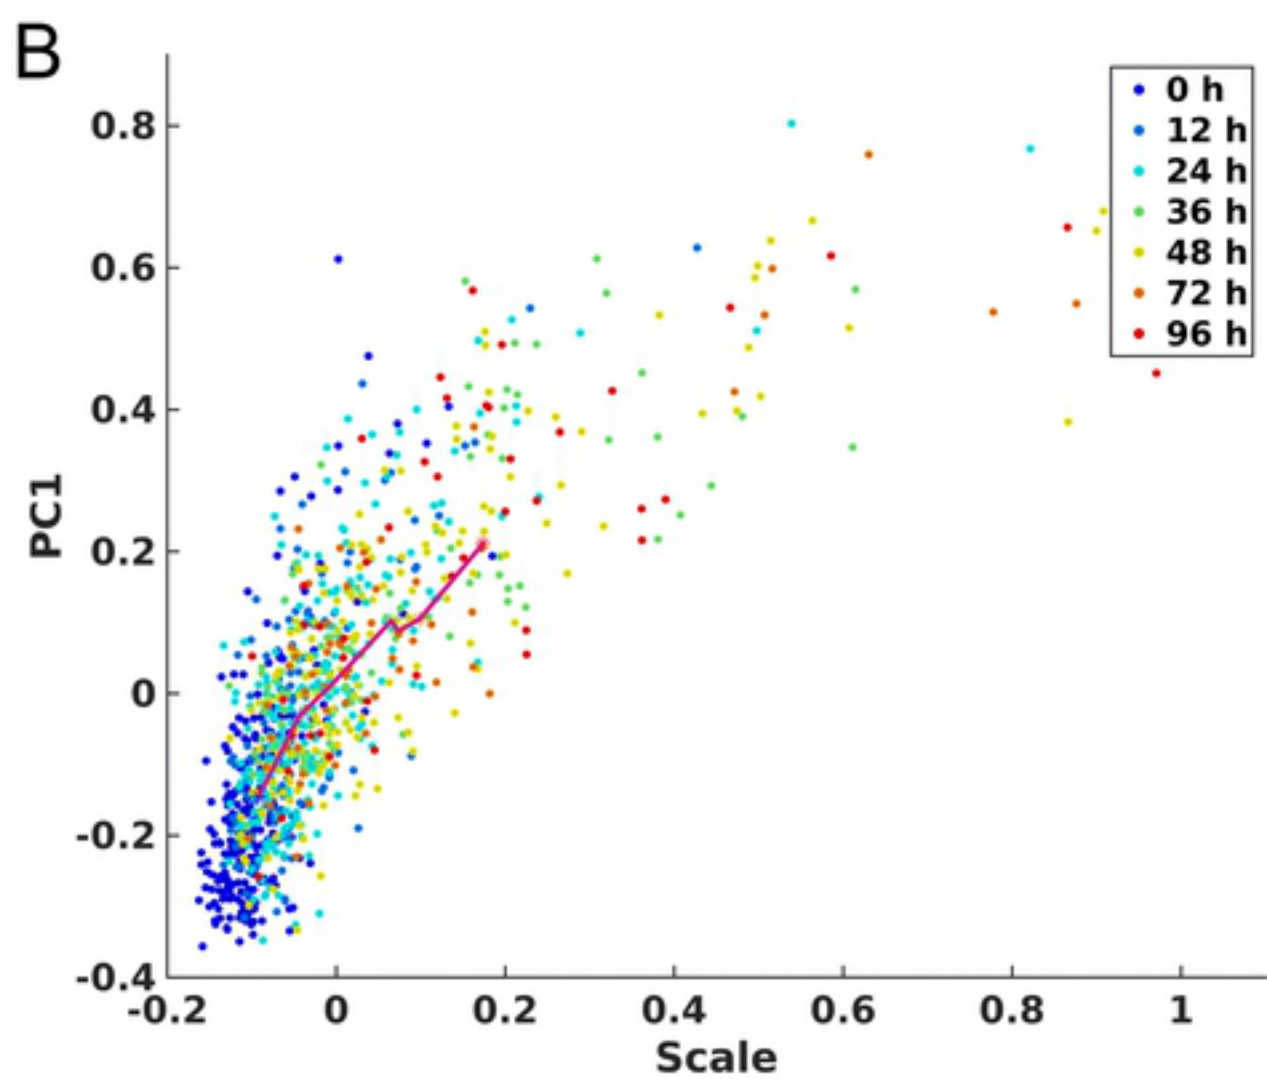

Figure 2

**A**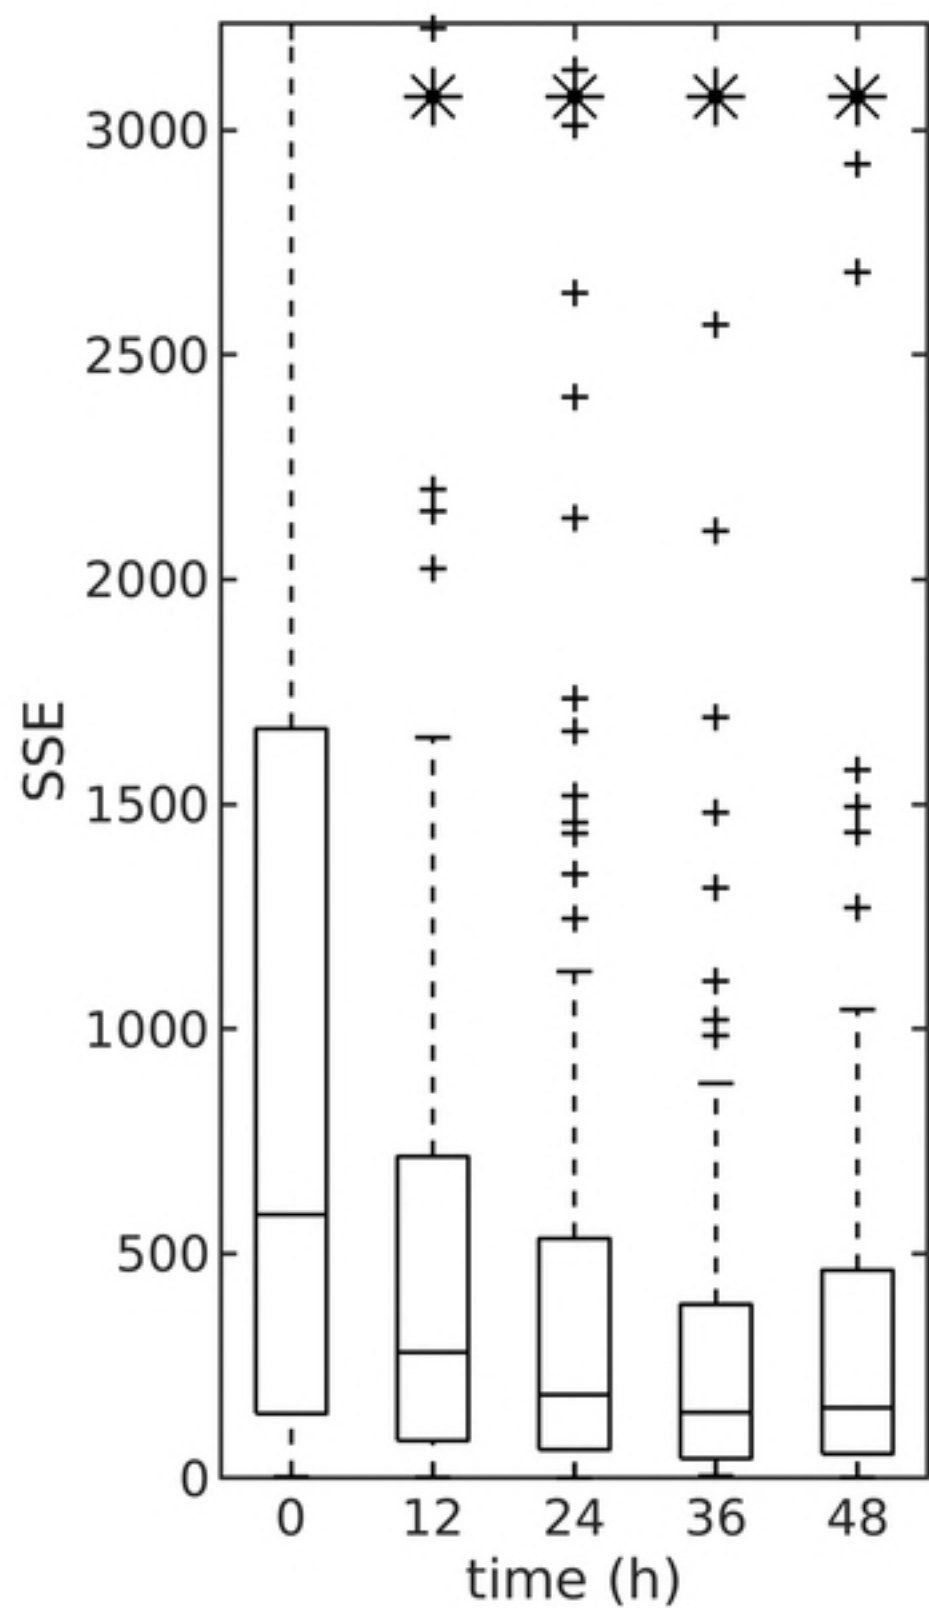**B**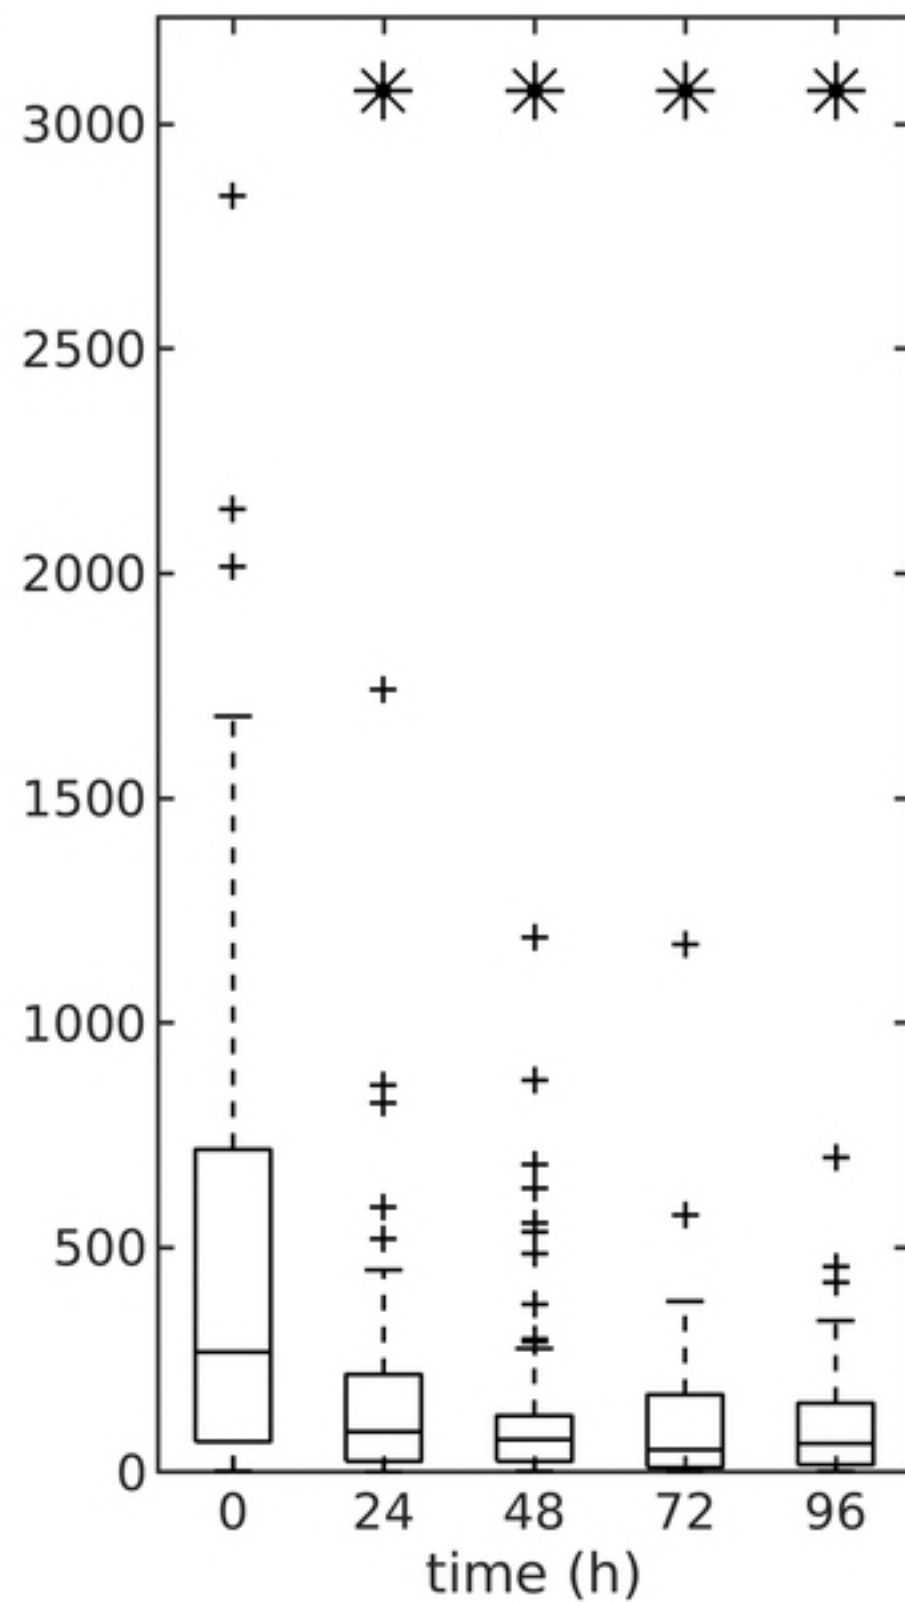

Figure 3

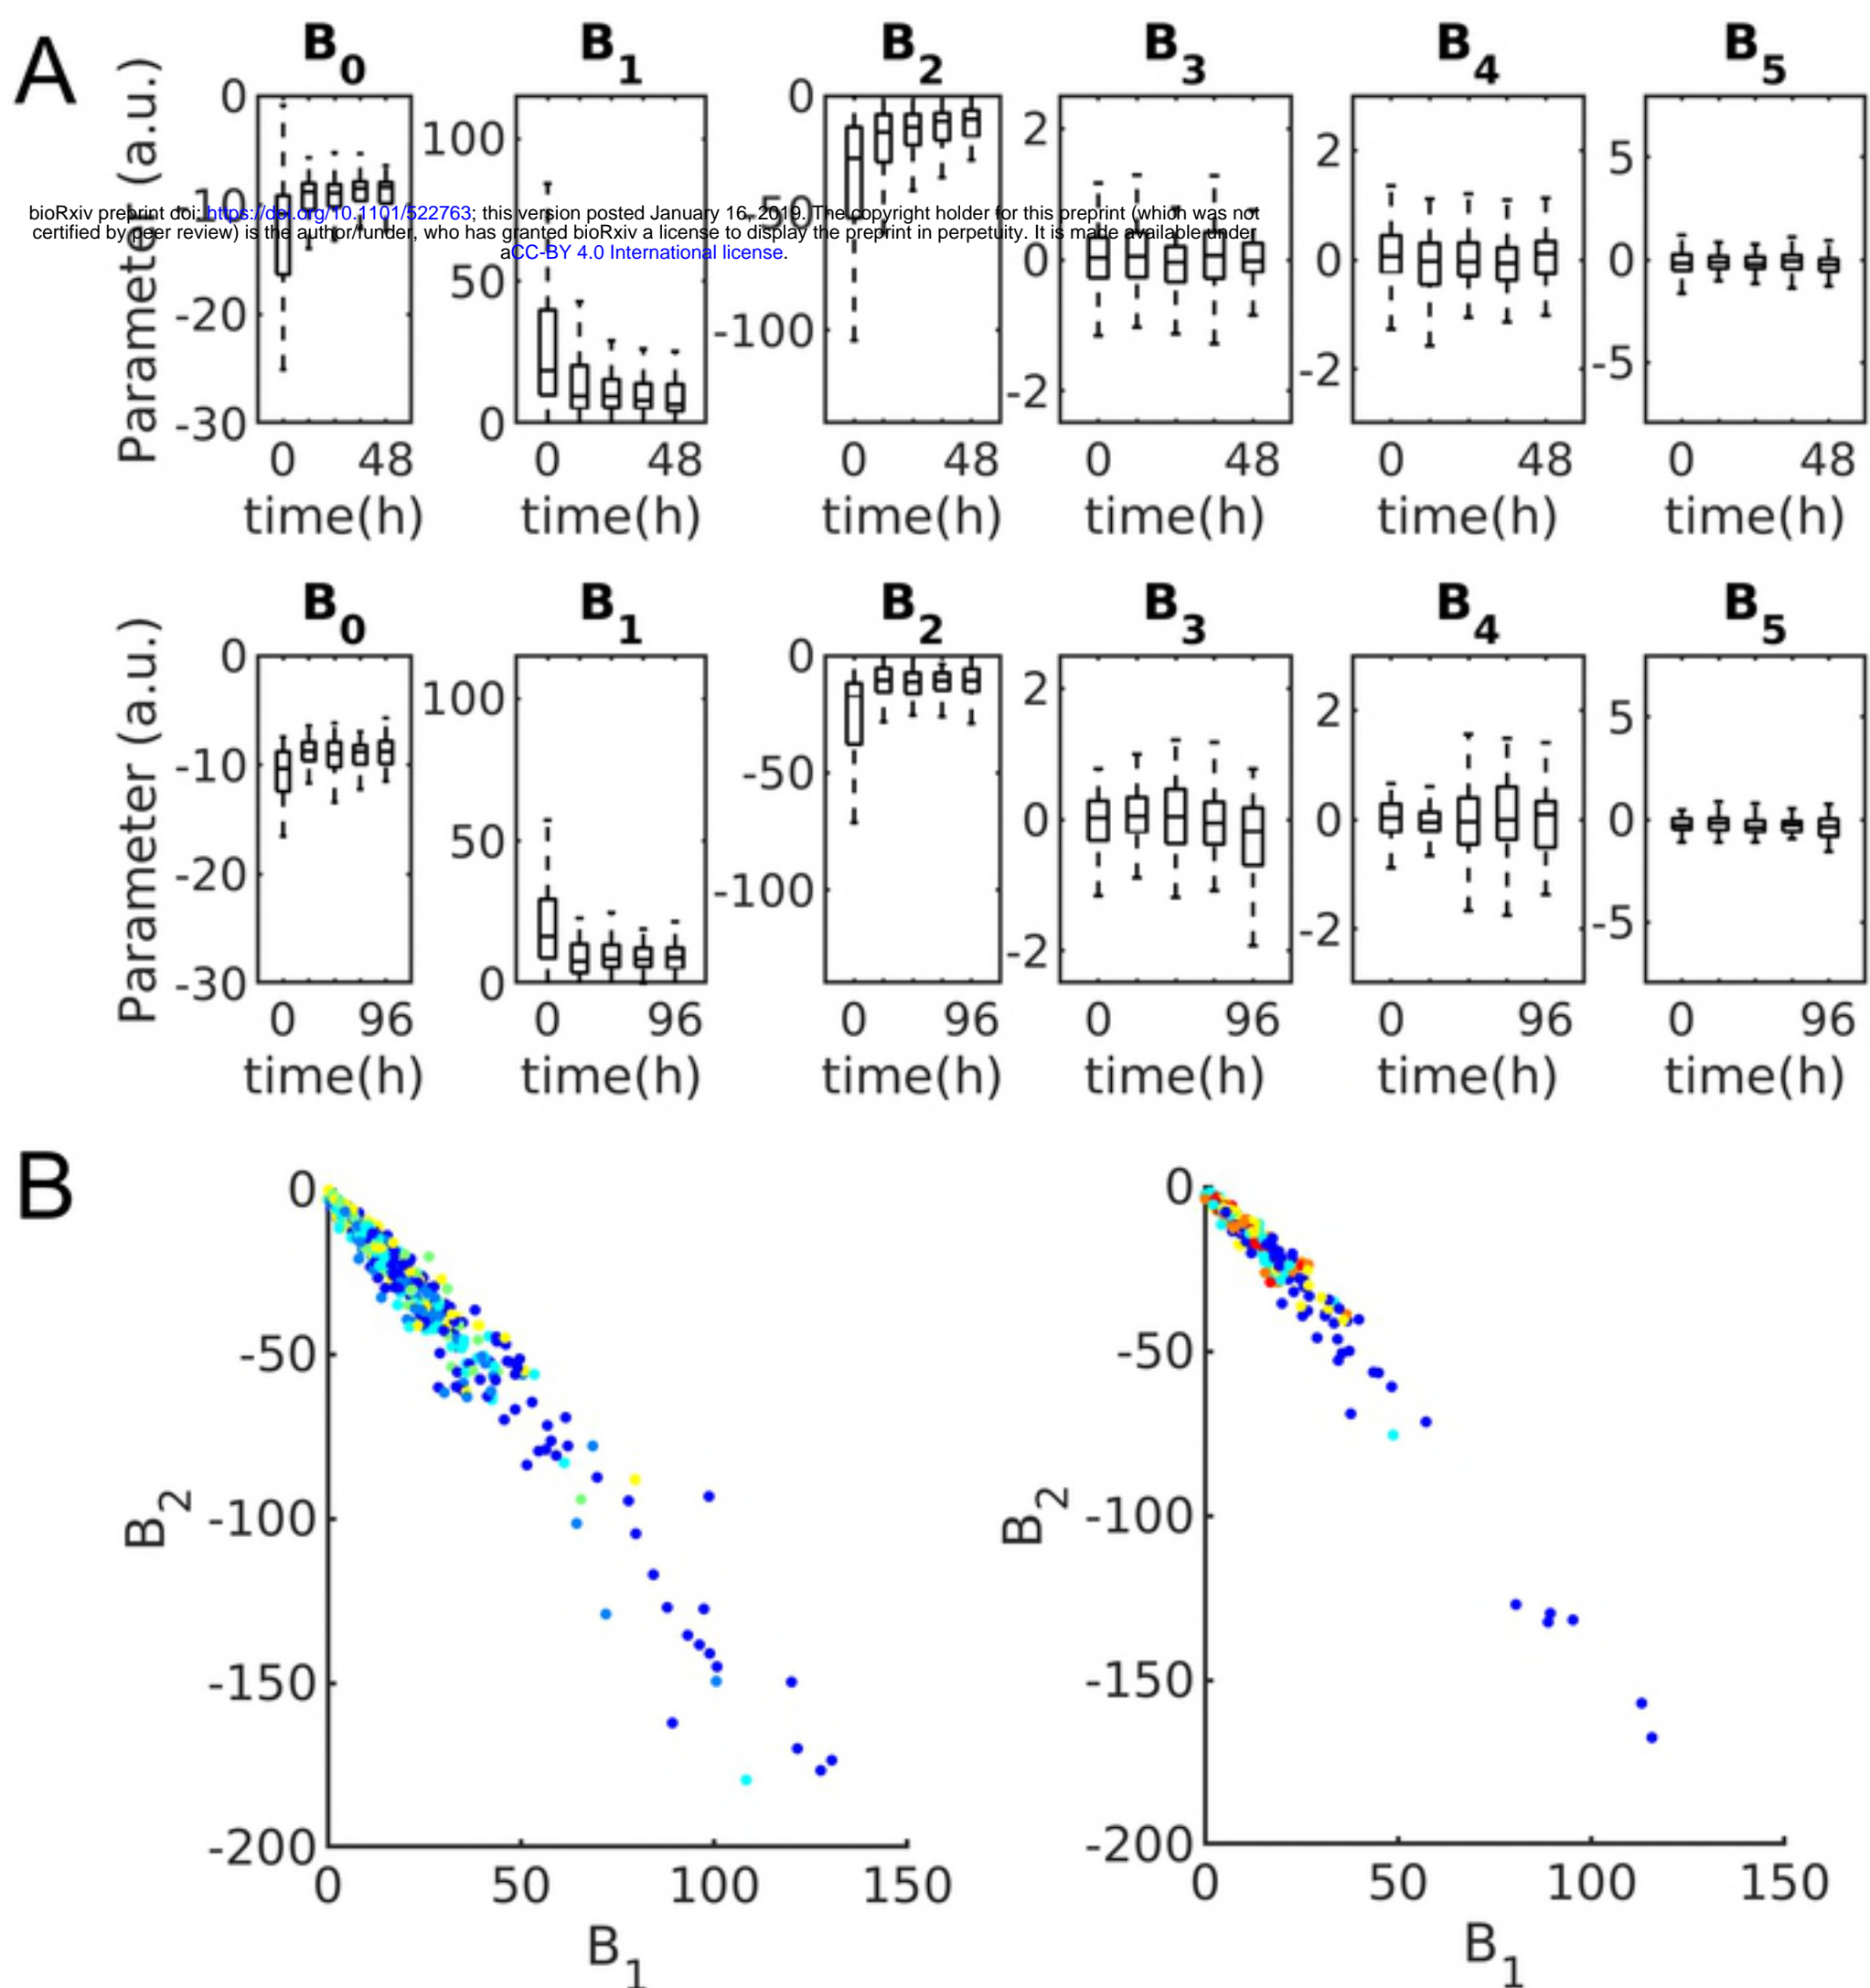

Figure 4



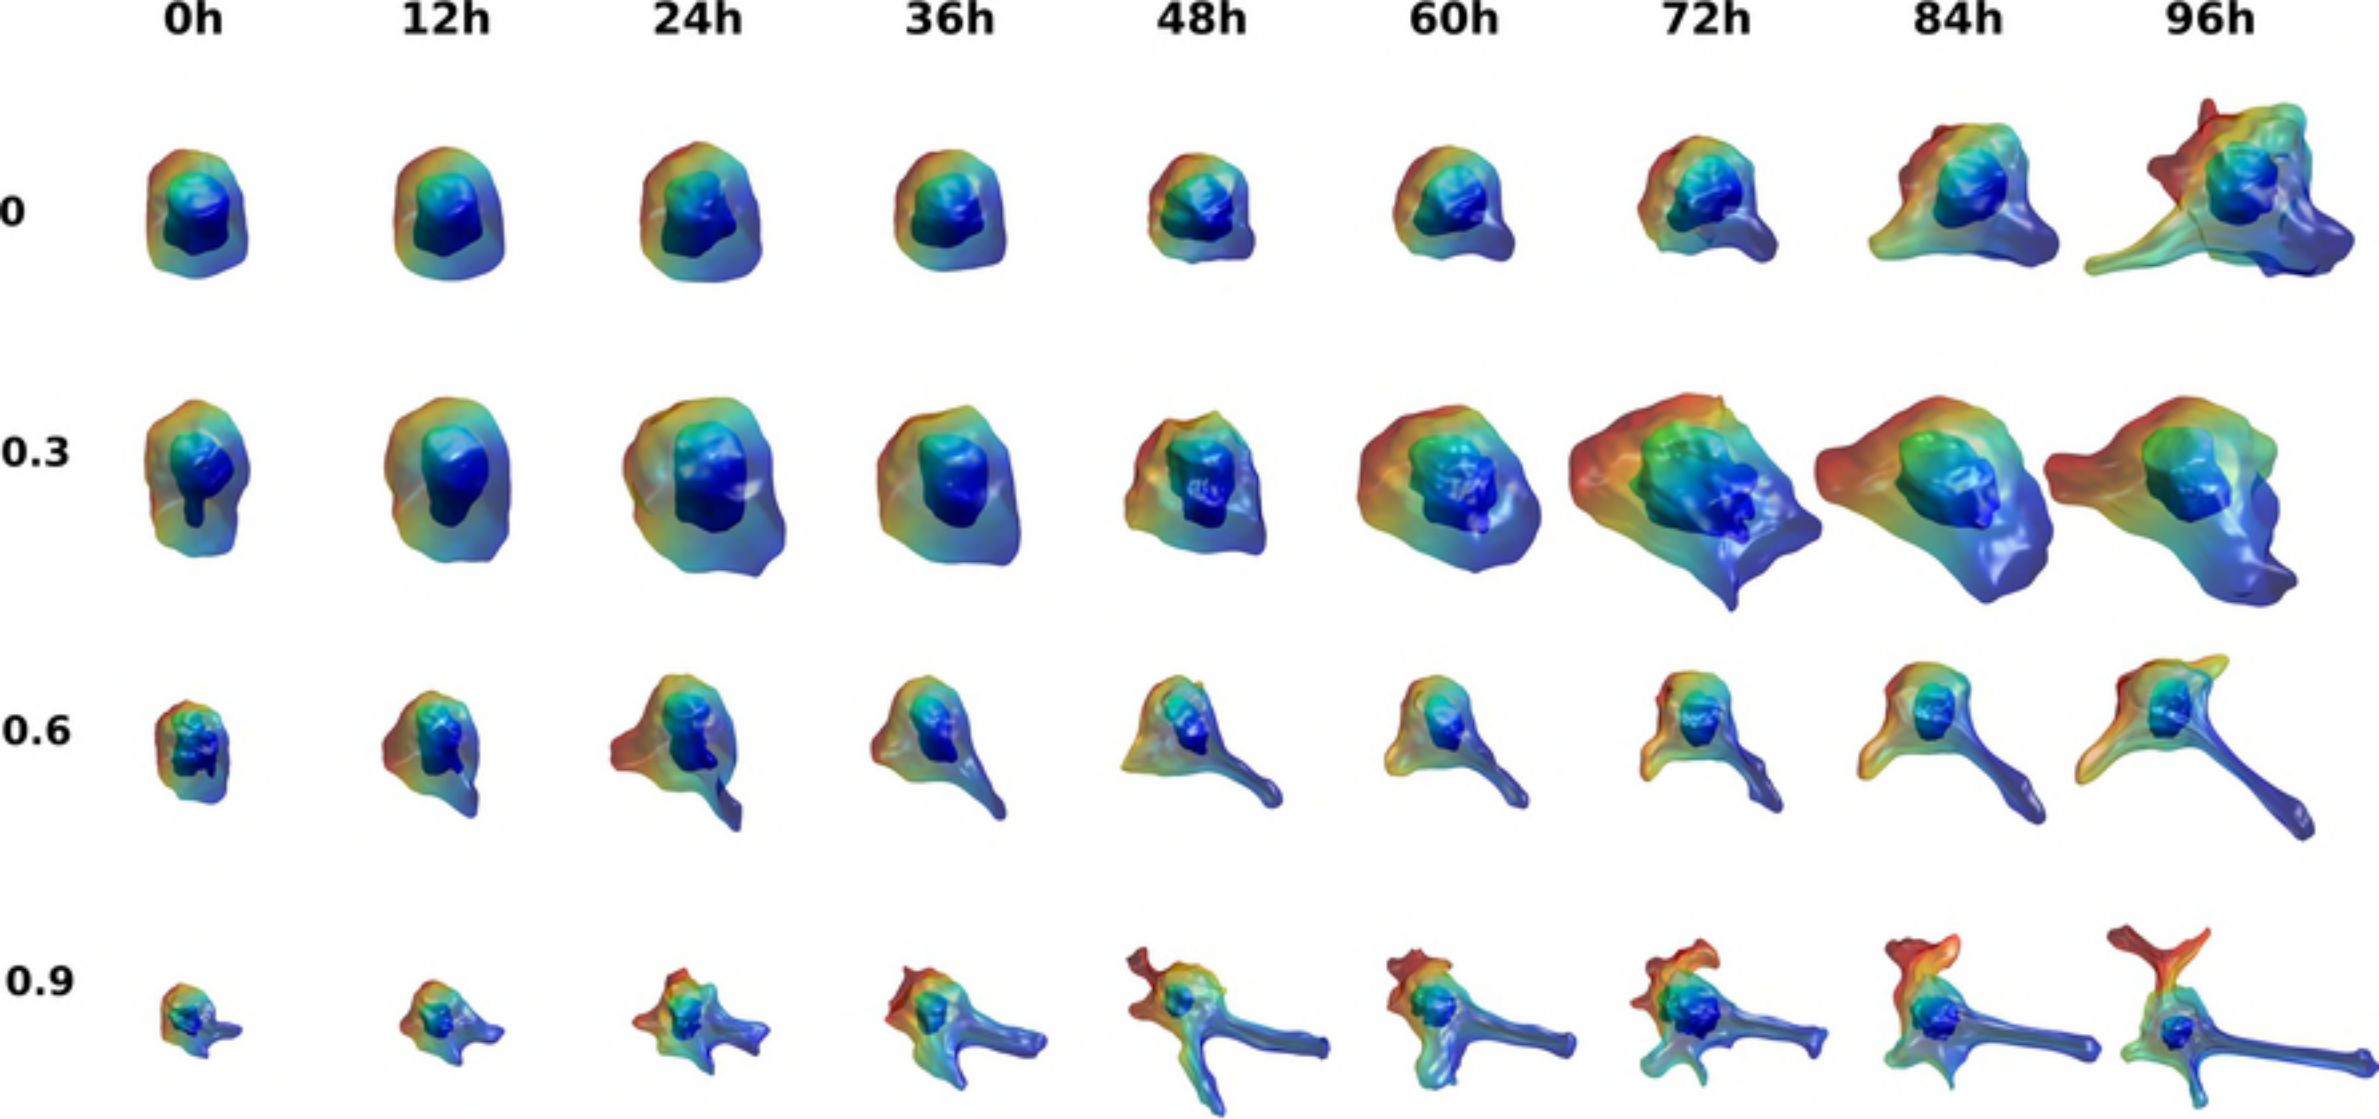

Figure 5

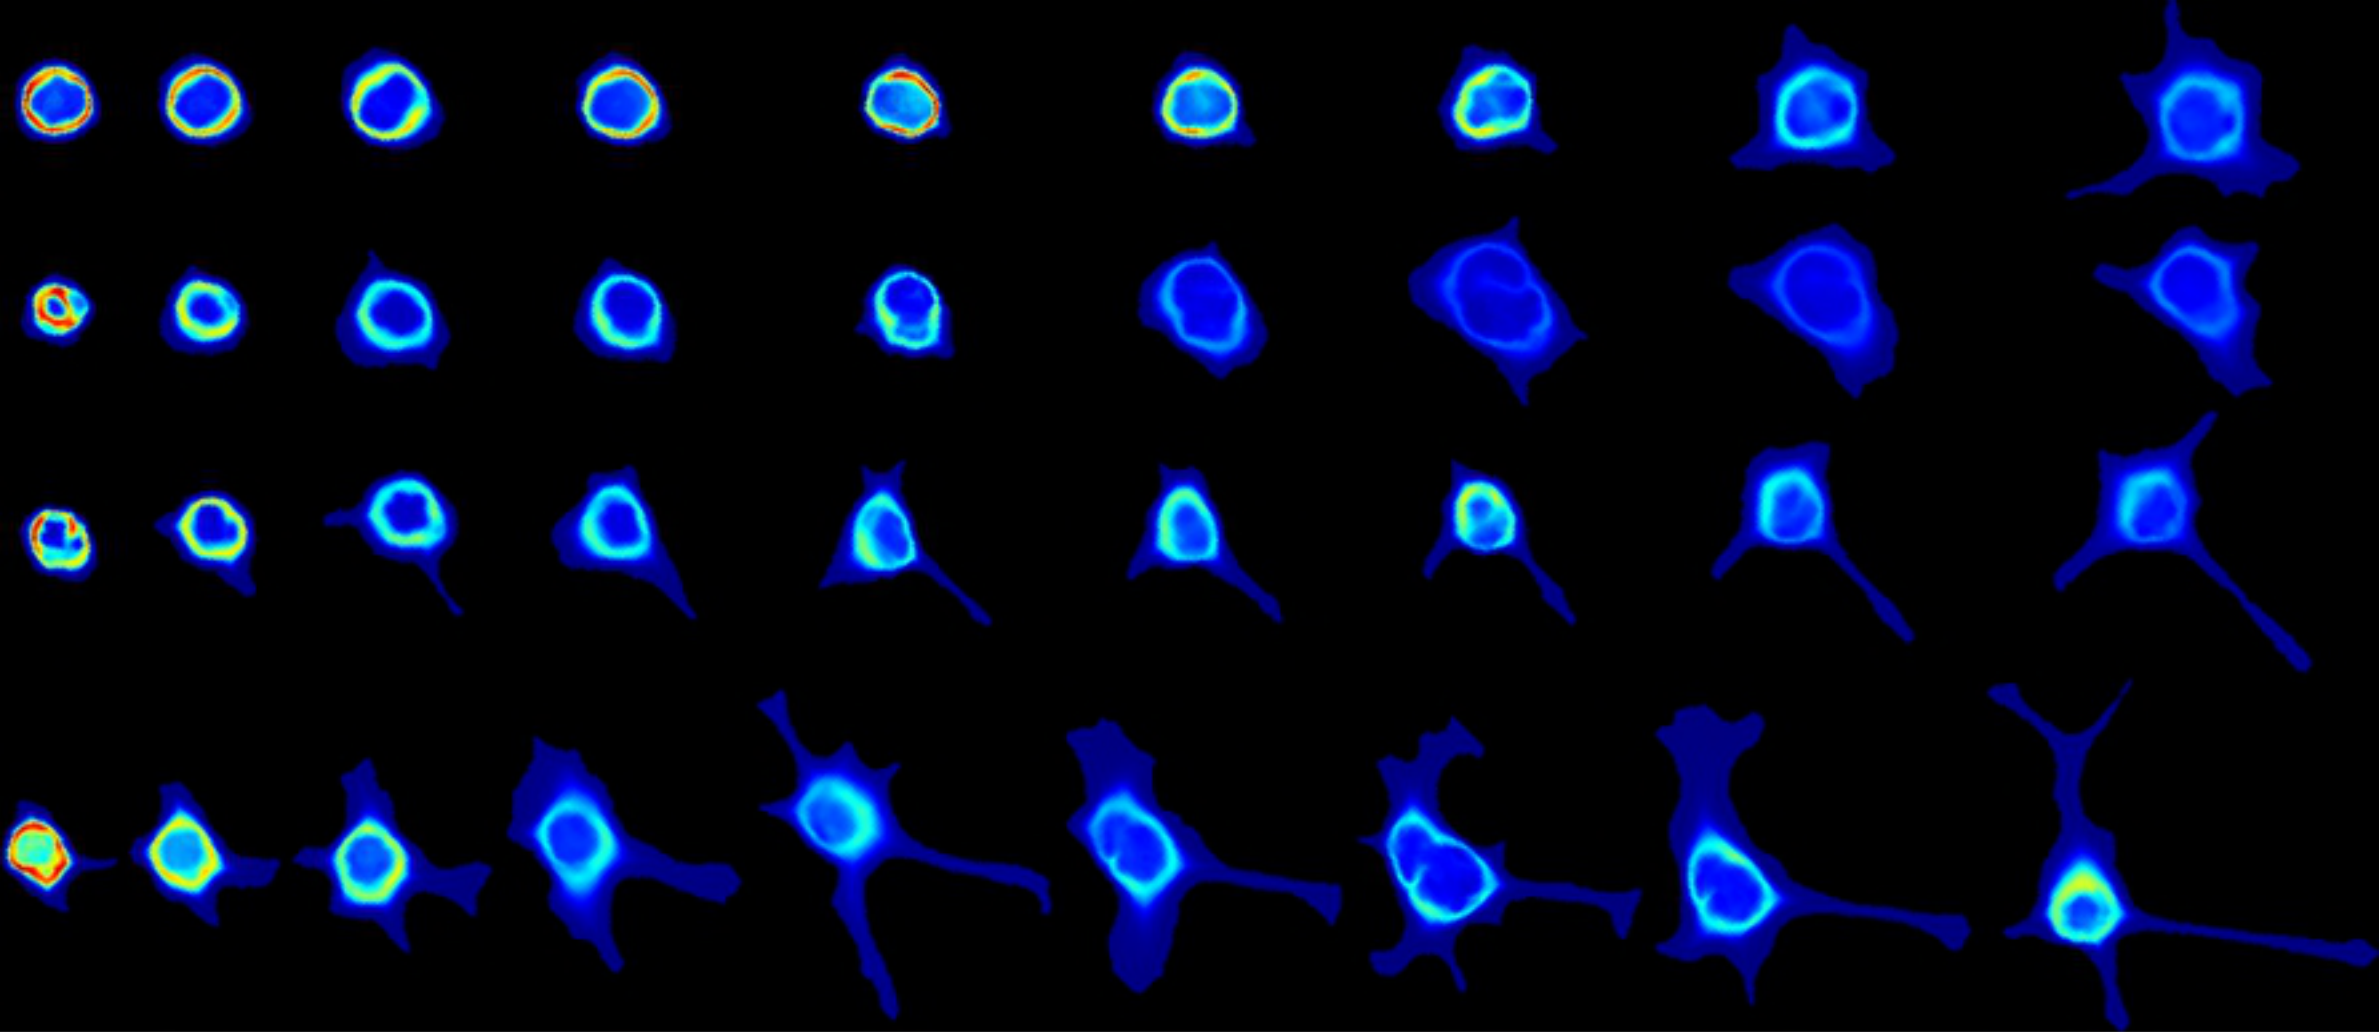

Figure 6
